# Supplementary material for: A Novel Mobile App and Population Management System to Manage Rheumatoid Arthritis Flares: Protocol for a Randomized Controlled Trial
Source: PubMed Central journal article supplement (PMC5917083; doi:10.2196/resprot.8771), 2018-04-11
Supplement: resprot_v7i4e84_app2.pdf [file resprot_v7i4e84_app2.pdf]

ID:

Date:

## **Physician Exit Form**

Please indicate your level of agreement with the following statements.

1. The smartphone app + population management system improved patient-physician communication.

- Strongly disagree
- Disagree
- Neither agree nor disagree
- Agree
- Strongly agree

2. The smartphone app + population management system resulted in earlier changes to long-term DMARD therapy.

- Strongly disagree
- Disagree
- Neither agree nor disagree
- Agree
- Strongly agree

3. The smartphone app + population management system improved overall management of RA disease activity.

- Strongly disagree
- Disagree
- Neither agree nor disagree
- Agree
- Strongly agree

4. The smartphone app + population management system increased my workload.

- Strongly disagree
- Disagree
- Neither agree nor disagree
- Agree
- Strongly agree

5. I would like to continue offering this system to my patients.

- Strongly disagree
- Disagree
- Neither agree nor disagree
- Agree
- Strongly agree

6. If you have any additional comments or suggestions, please provide them here:
